# Supplementary material for: The predicting roles of carcinoembryonic antigen and its underlying mechanism in the progression of coronavirus disease 2019
Source: Springer Nature journal article supplement (doi:10.1186/s13054-021-03661-y), 2021-07-03
Supplement: MOESM3 [file 19329012]

# Hazard ratio

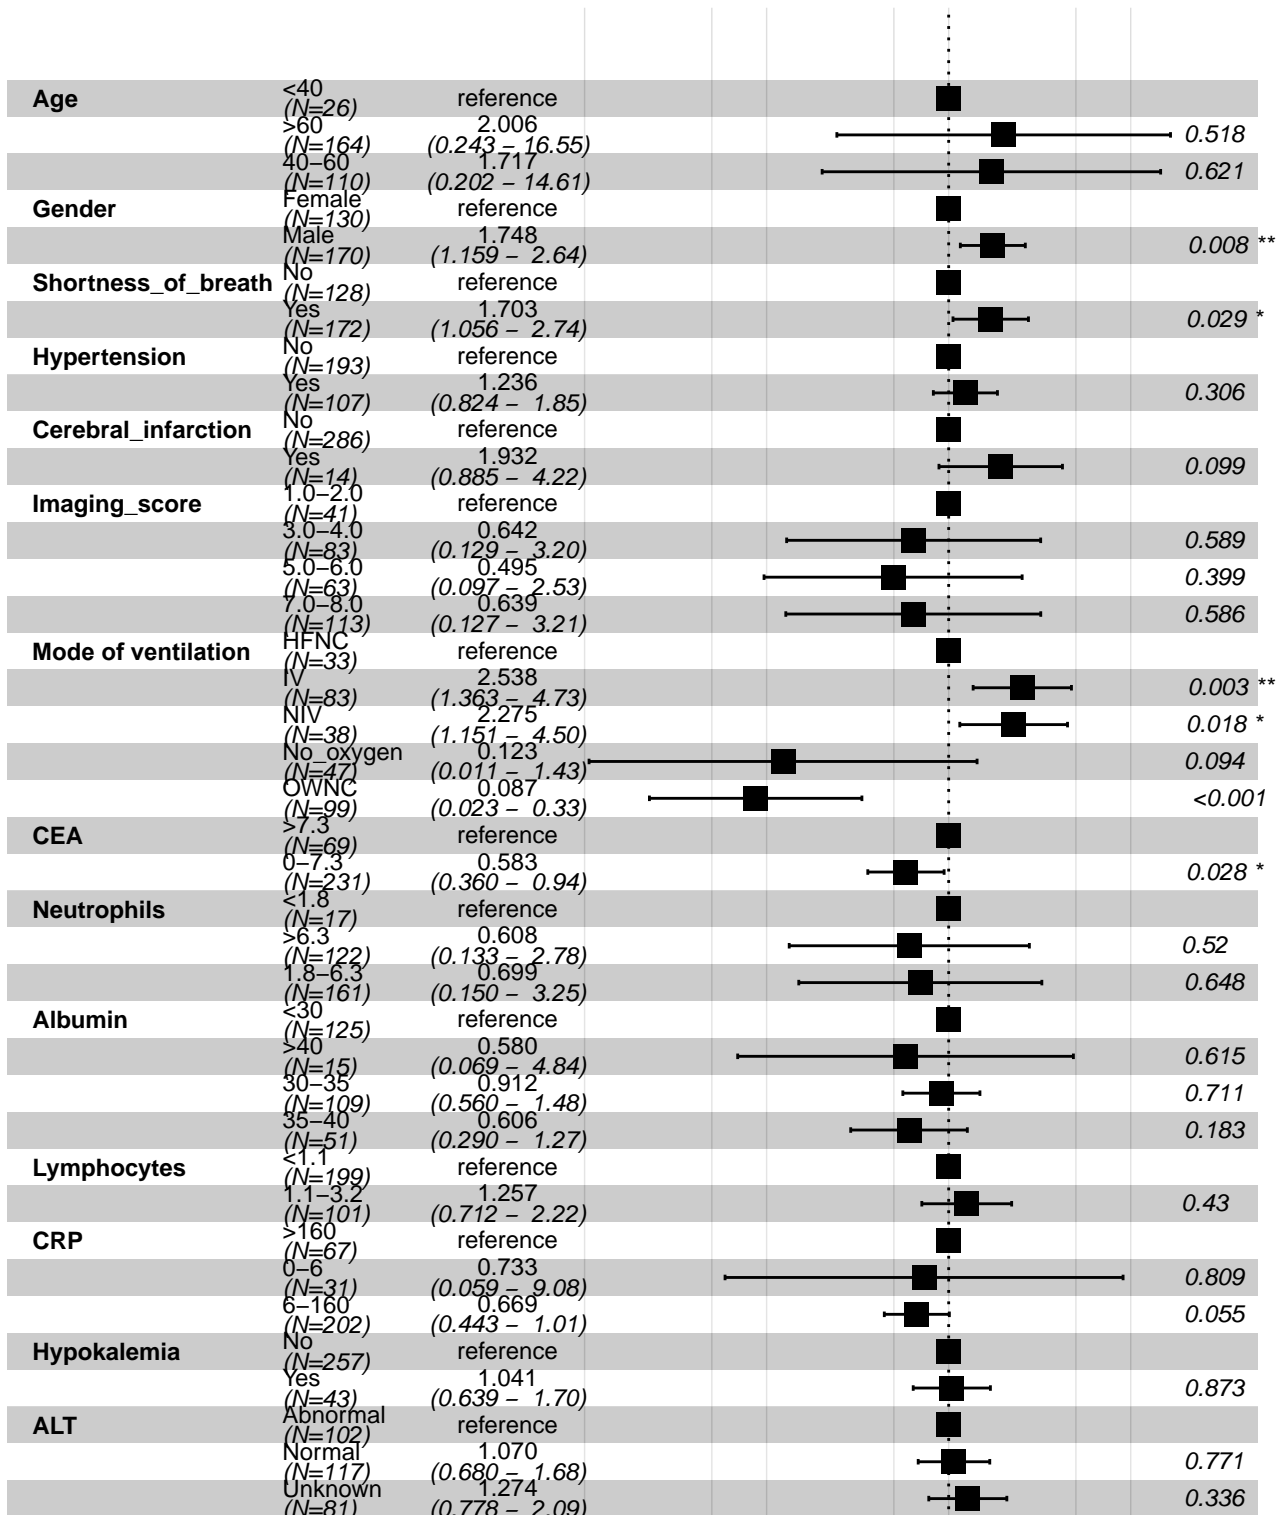

# Events: 126; Global p-value (Log-Rank): 3.5804e-25

AIC: 1100.53; Concordance Index: 0.82

0.01      0.05    0.1      0.5    1      5    10

# Hazard ratio

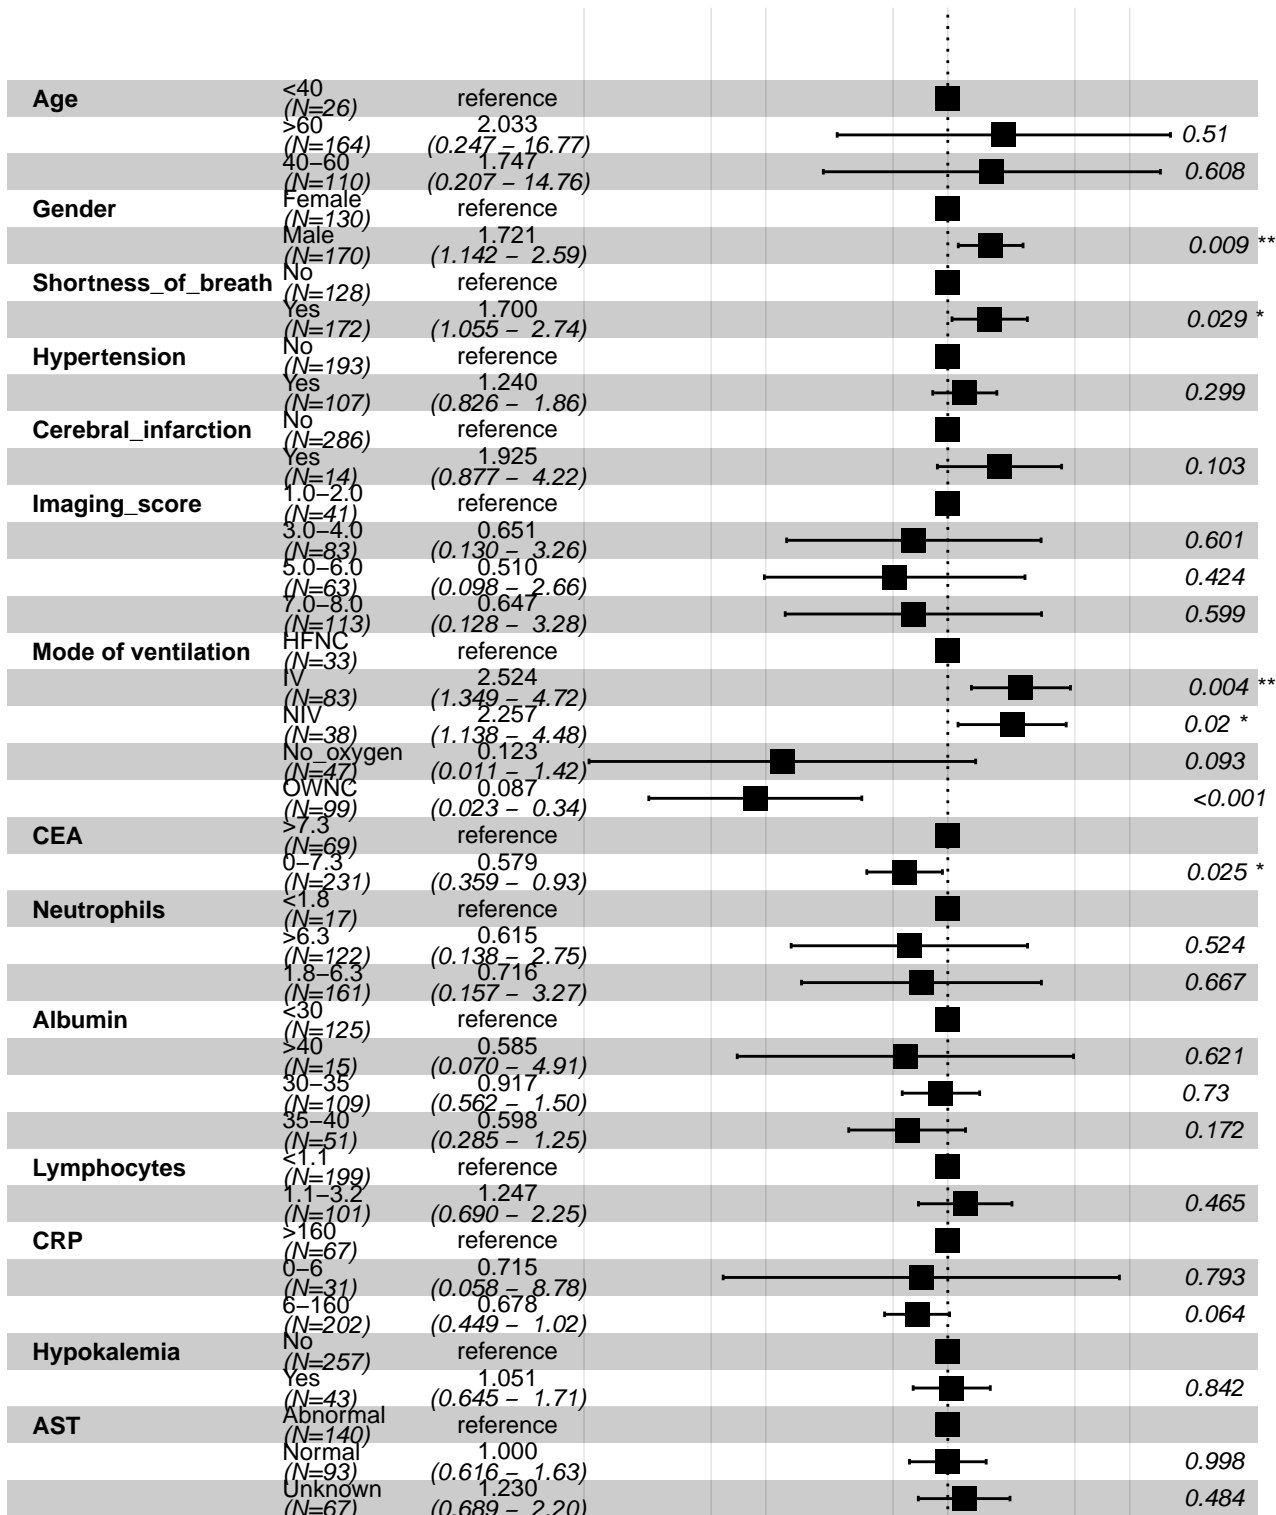

# Events: 126; Global p-value (Log-Rank): 4.2635e-25

AIC: 1100.93; Concordance Index: 0.82

0.01      0.05    0.1      0.5    1      5    10

# Hazard ratio

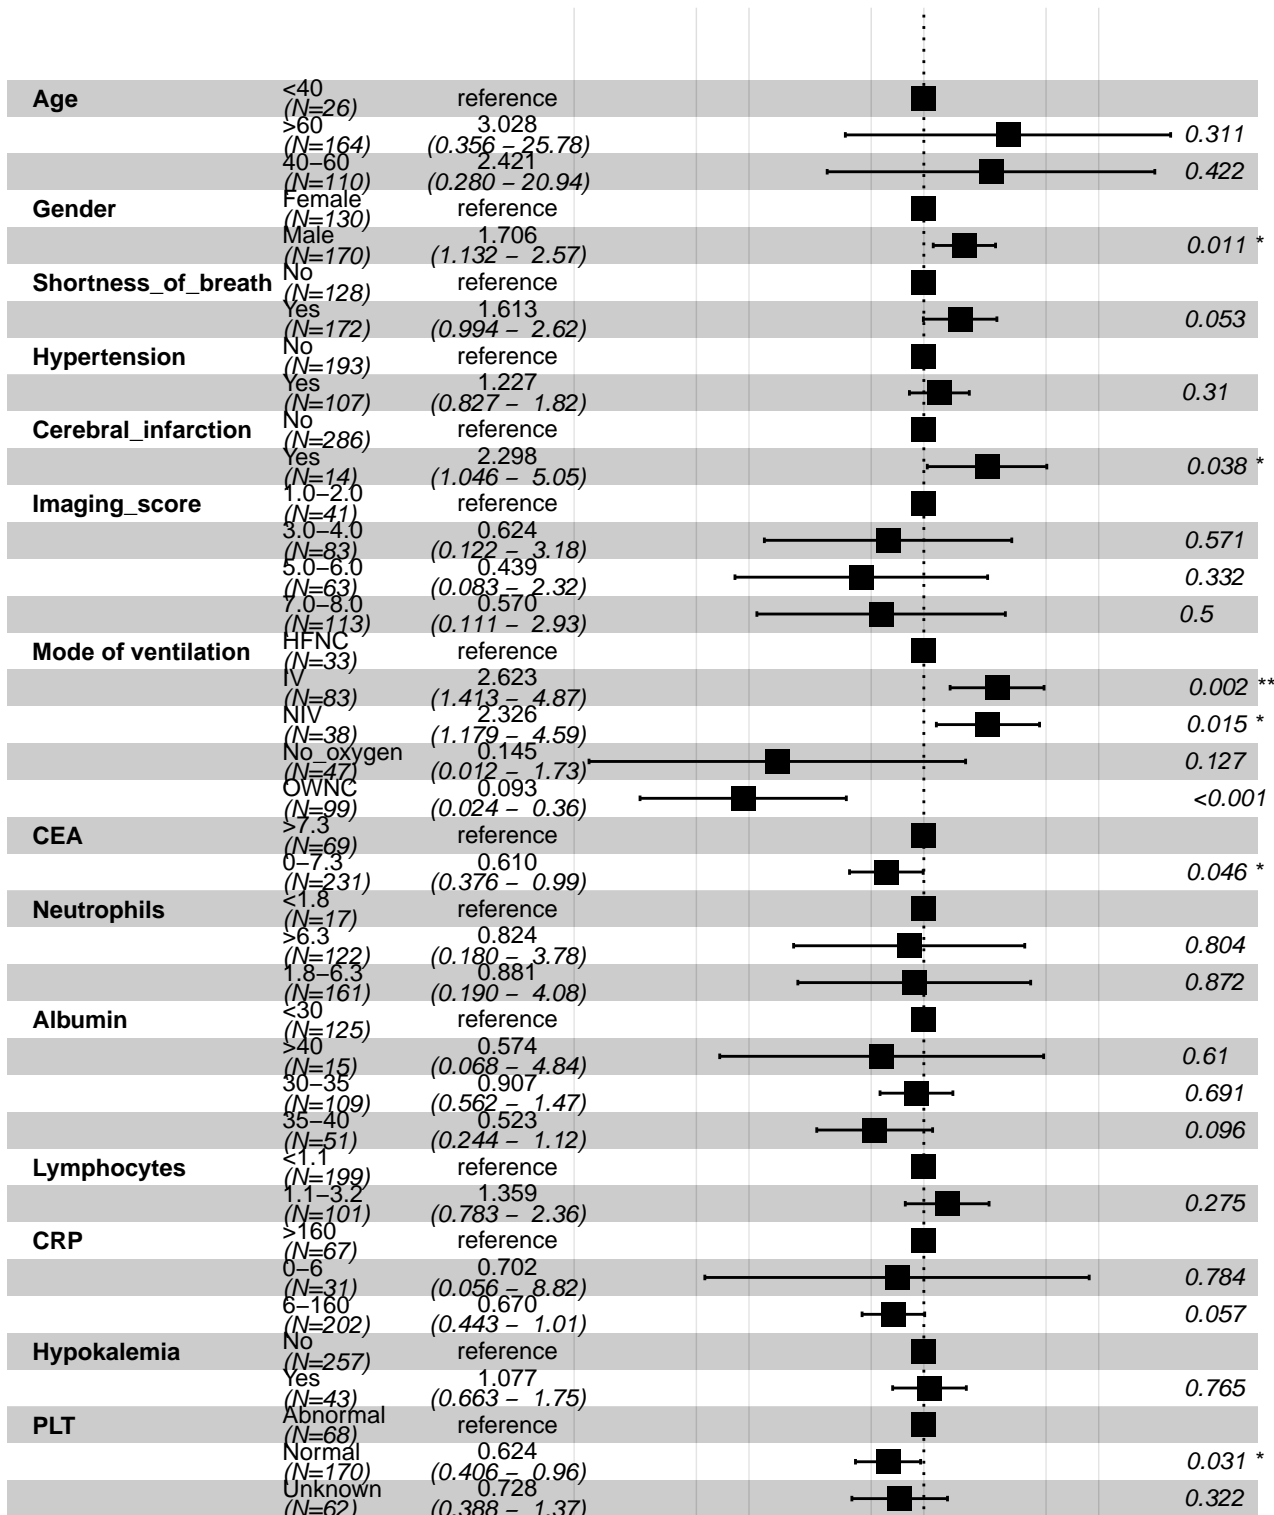

# Events: 126; Global p-value (Log-Rank): 7.3817e-26

AIC: 1096.92; Concordance Index: 0.82

0.01    0.05    0.1    0.5    1    5    10

# Hazard ratio

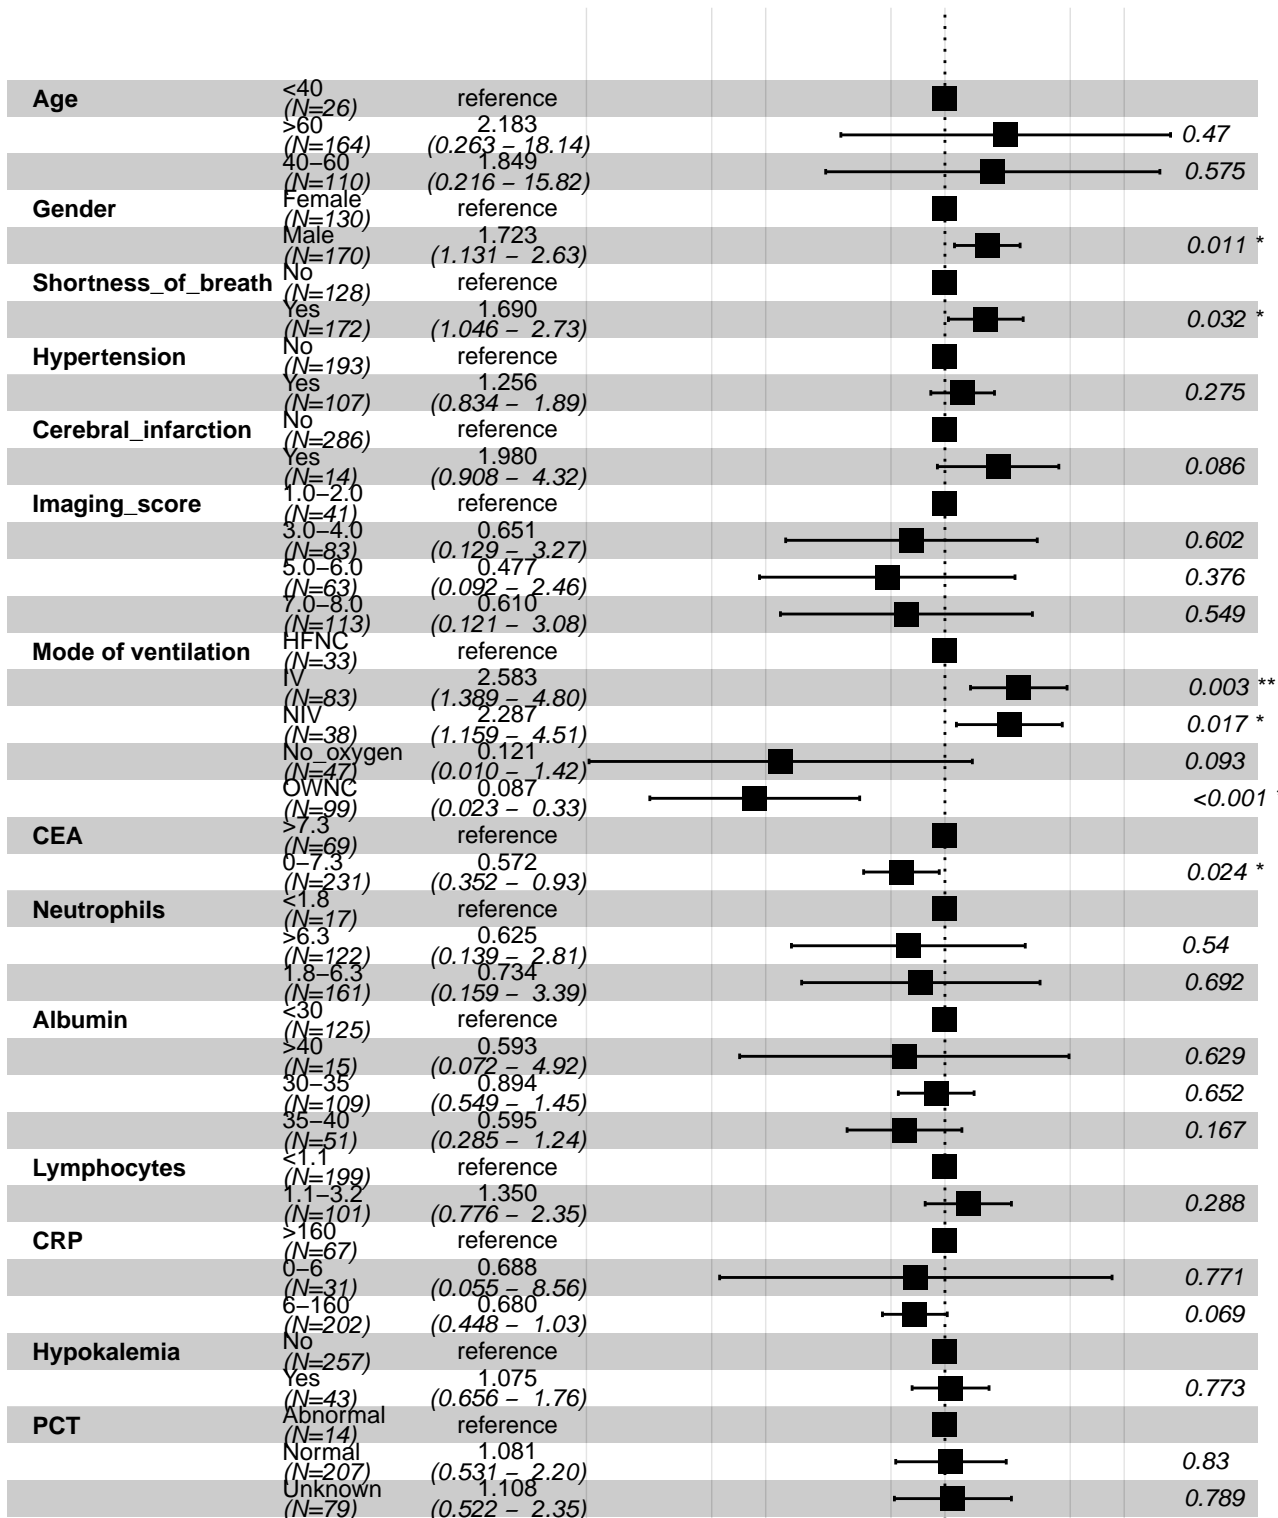

# Events: 126; Global p-value (Log-Rank): 5.1595e-25

AIC: 1101.37; Concordance Index: 0.82

0.01      0.05    0.1      0.5    1      5    10

# Hazard ratio

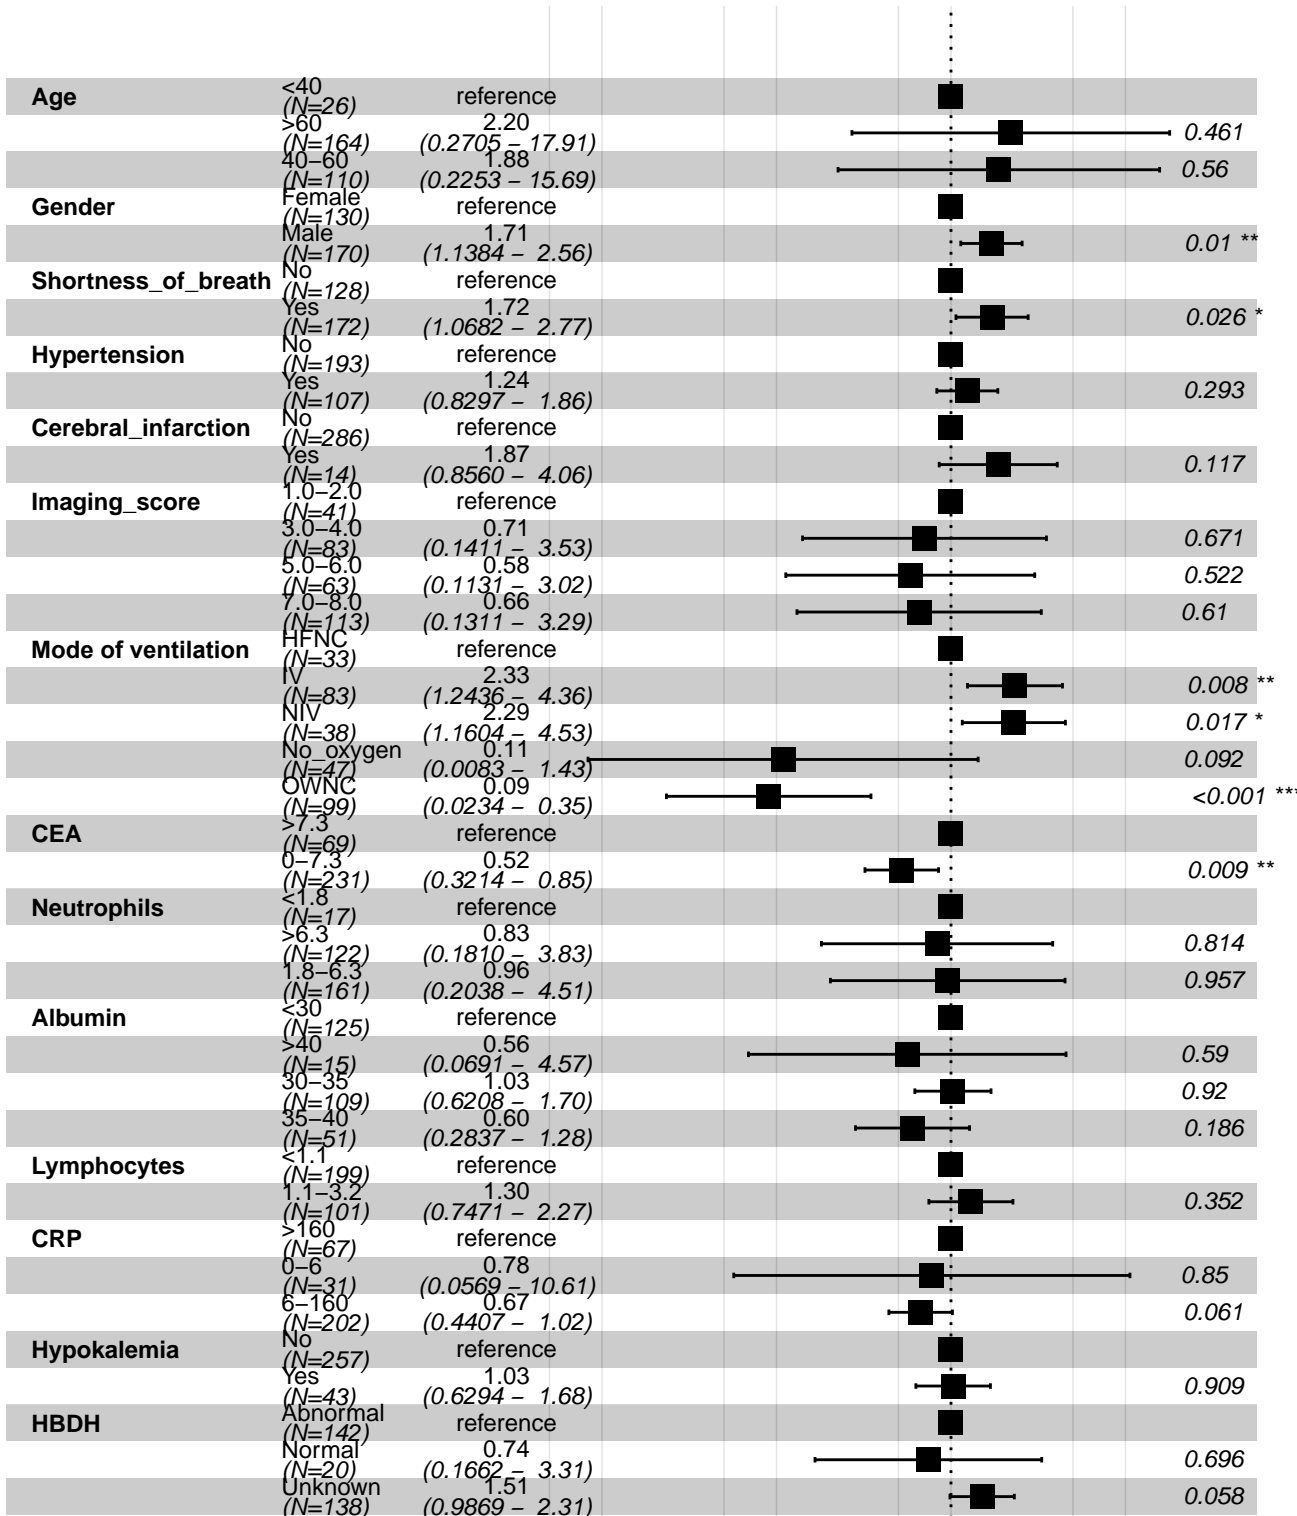

# Events: 126; Global p-value (Log-Rank): 8.6666e-26

AIC: 1097.29; Concordance Index: 0.83

0.005 0.01      0.05 0.1      0.5 1      5 10

# Hazard ratio

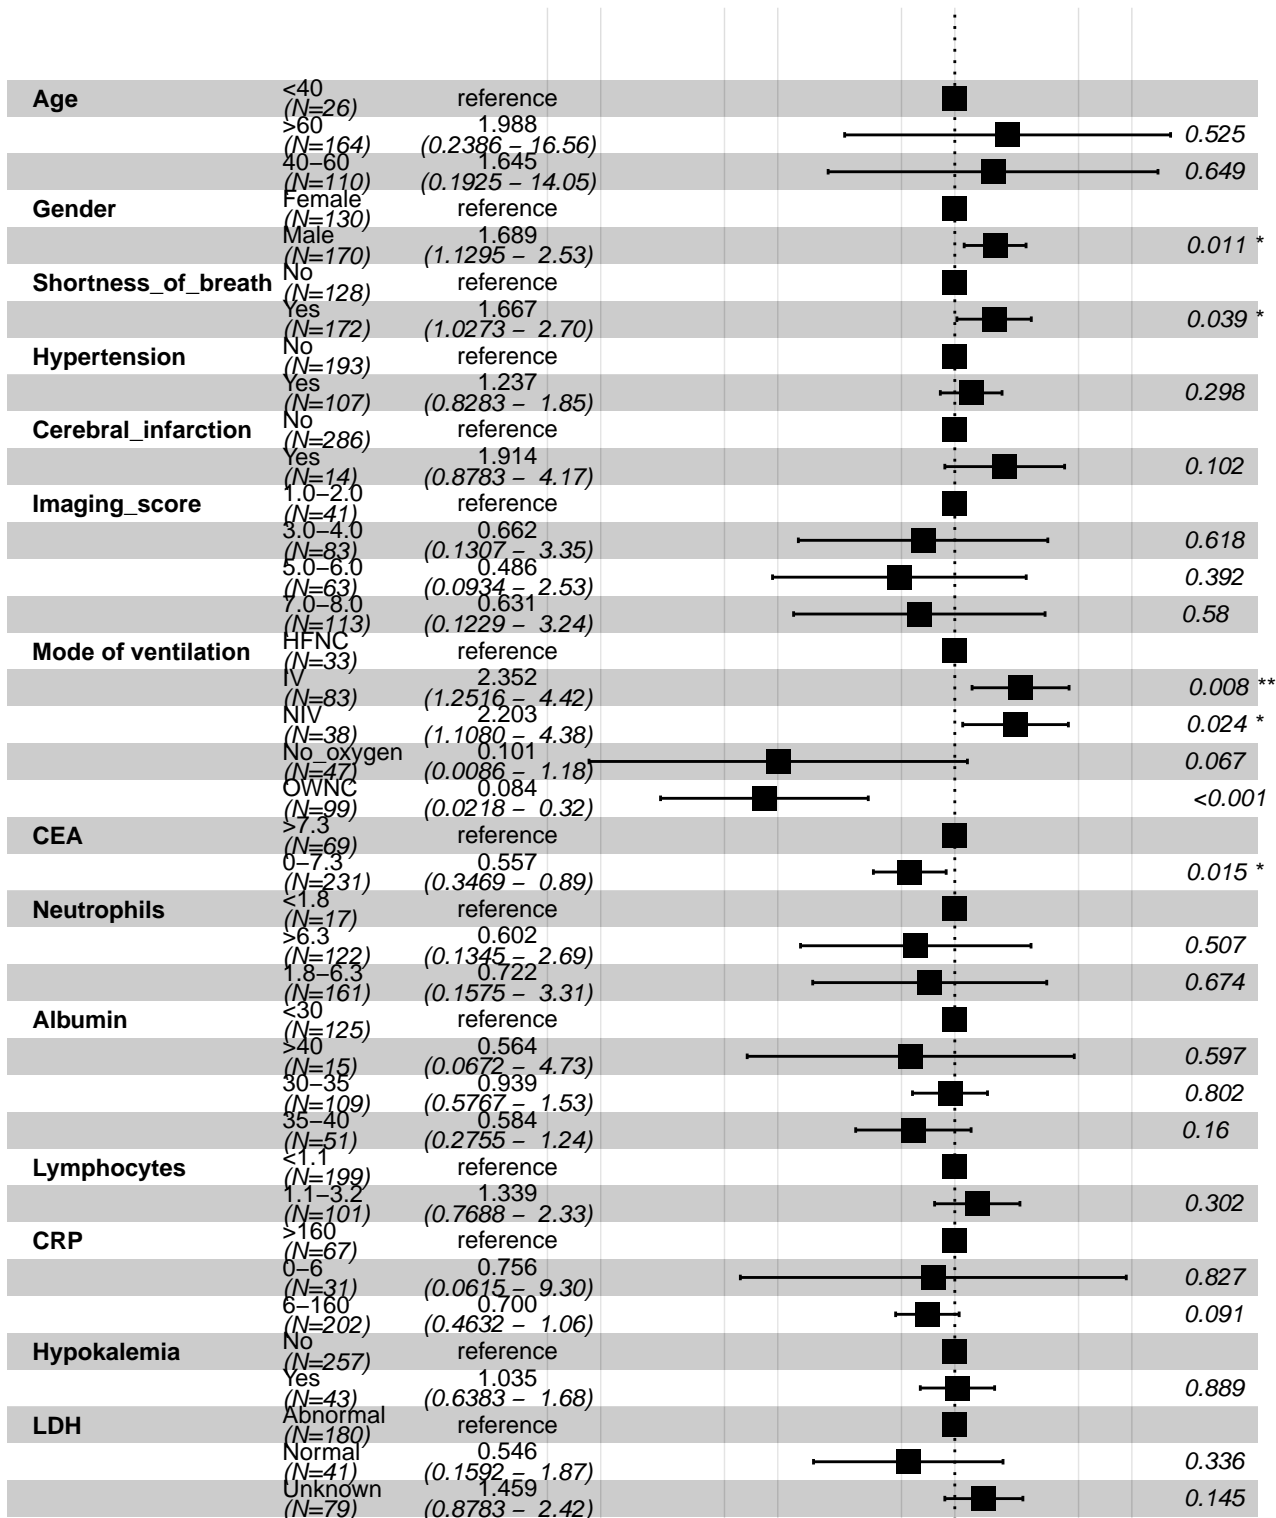

# Events: 126; Global p-value (Log-Rank): 1.0581e-25

AIC: 1097.74; Concordance Index: 0.83

0.005 0.01      0.05 0.1      0.5 1      5 10

# Hazard ratio

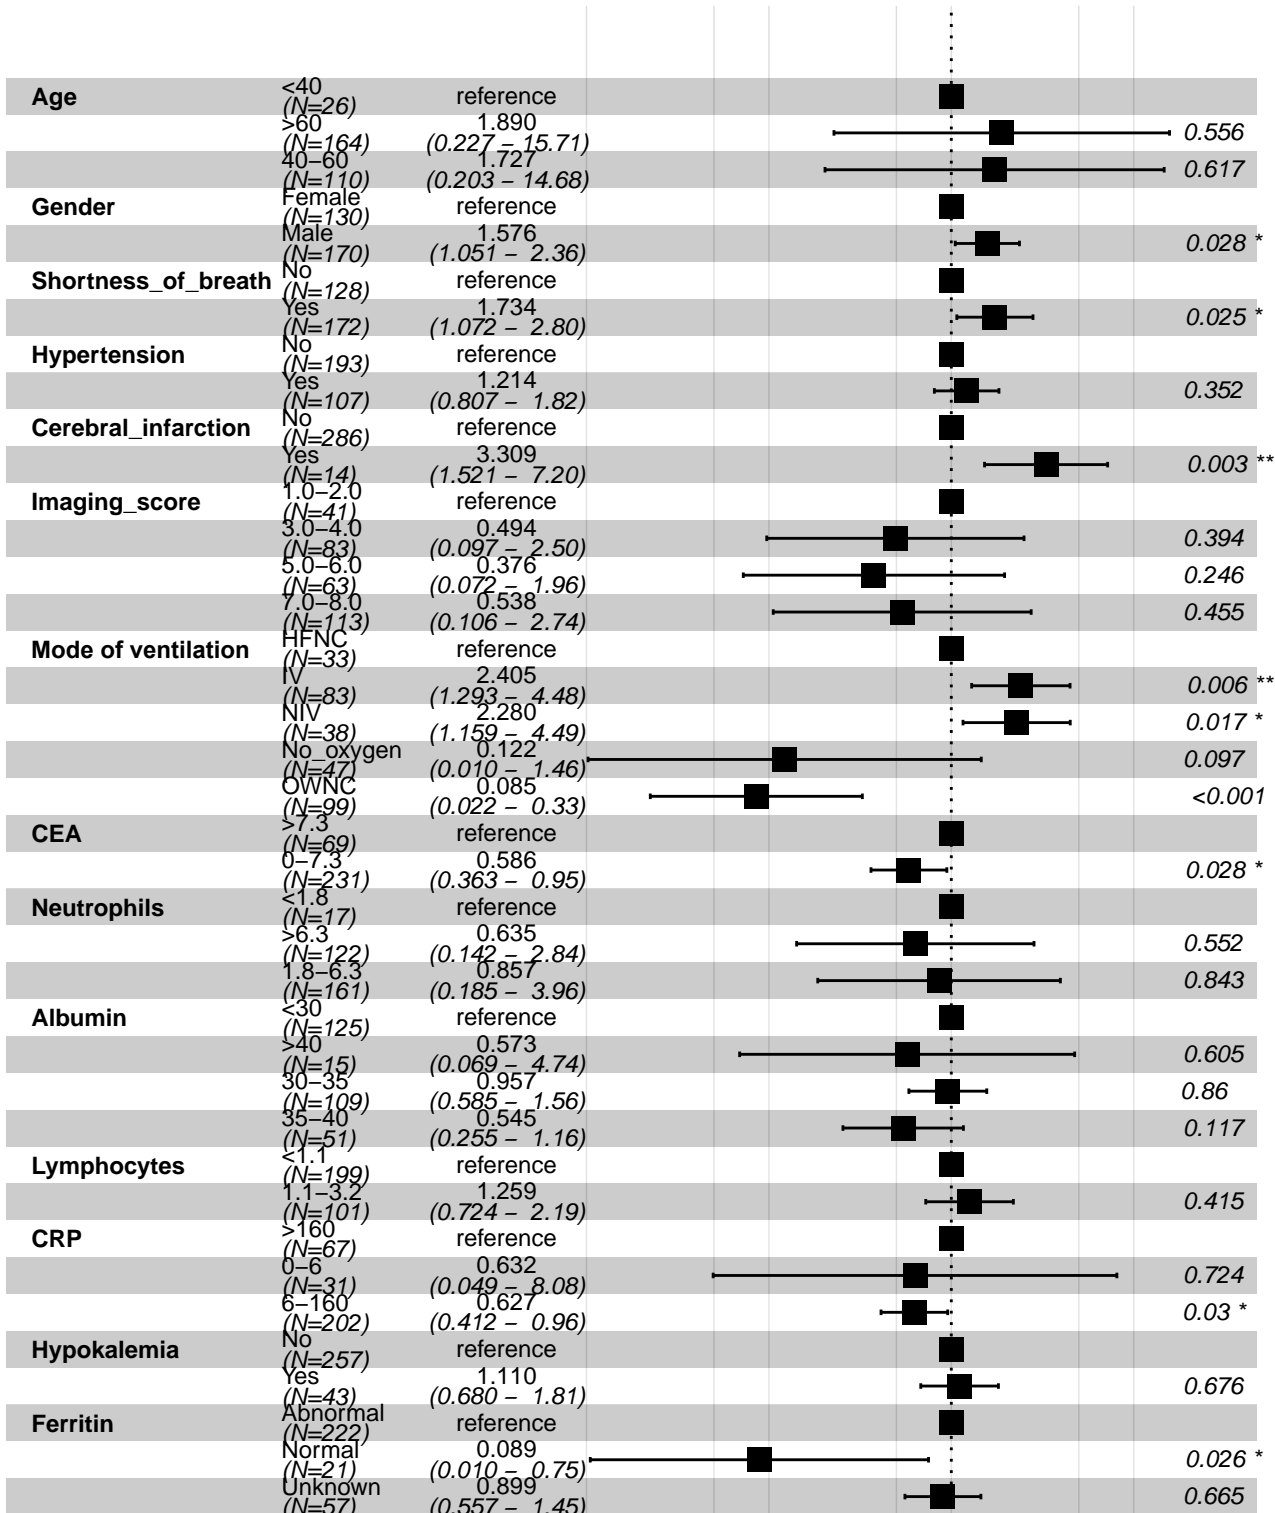

# Events: 126; Global p-value (Log-Rank): 1.2007e-26

AIC: 1092.78; Concordance Index: 0.83

0.01      0.05    0.1      0.5    1      5    10

# Hazard ratio

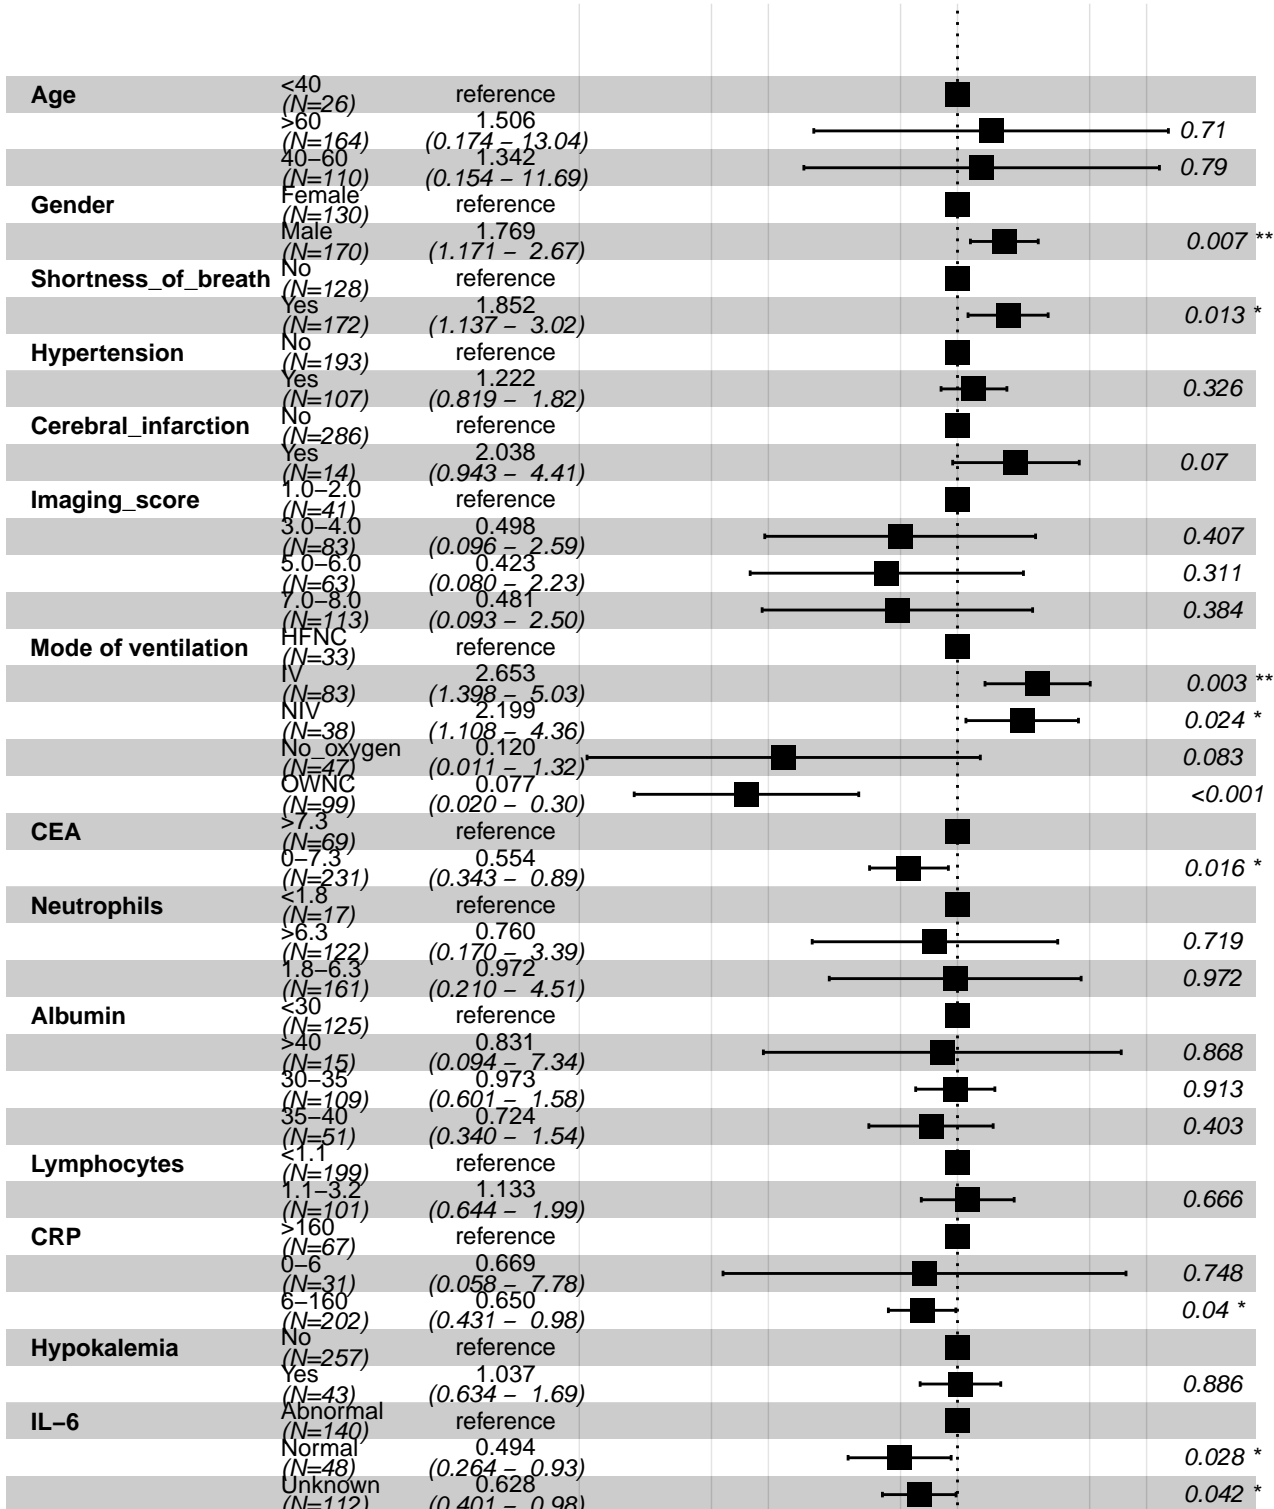

# Events: 126; Global p-value (Log-Rank): 2.0368e-26

AIC: 1093.98; Concordance Index: 0.83

0.01      0.05    0.1      0.5    1      5    10



# Hazard ratio

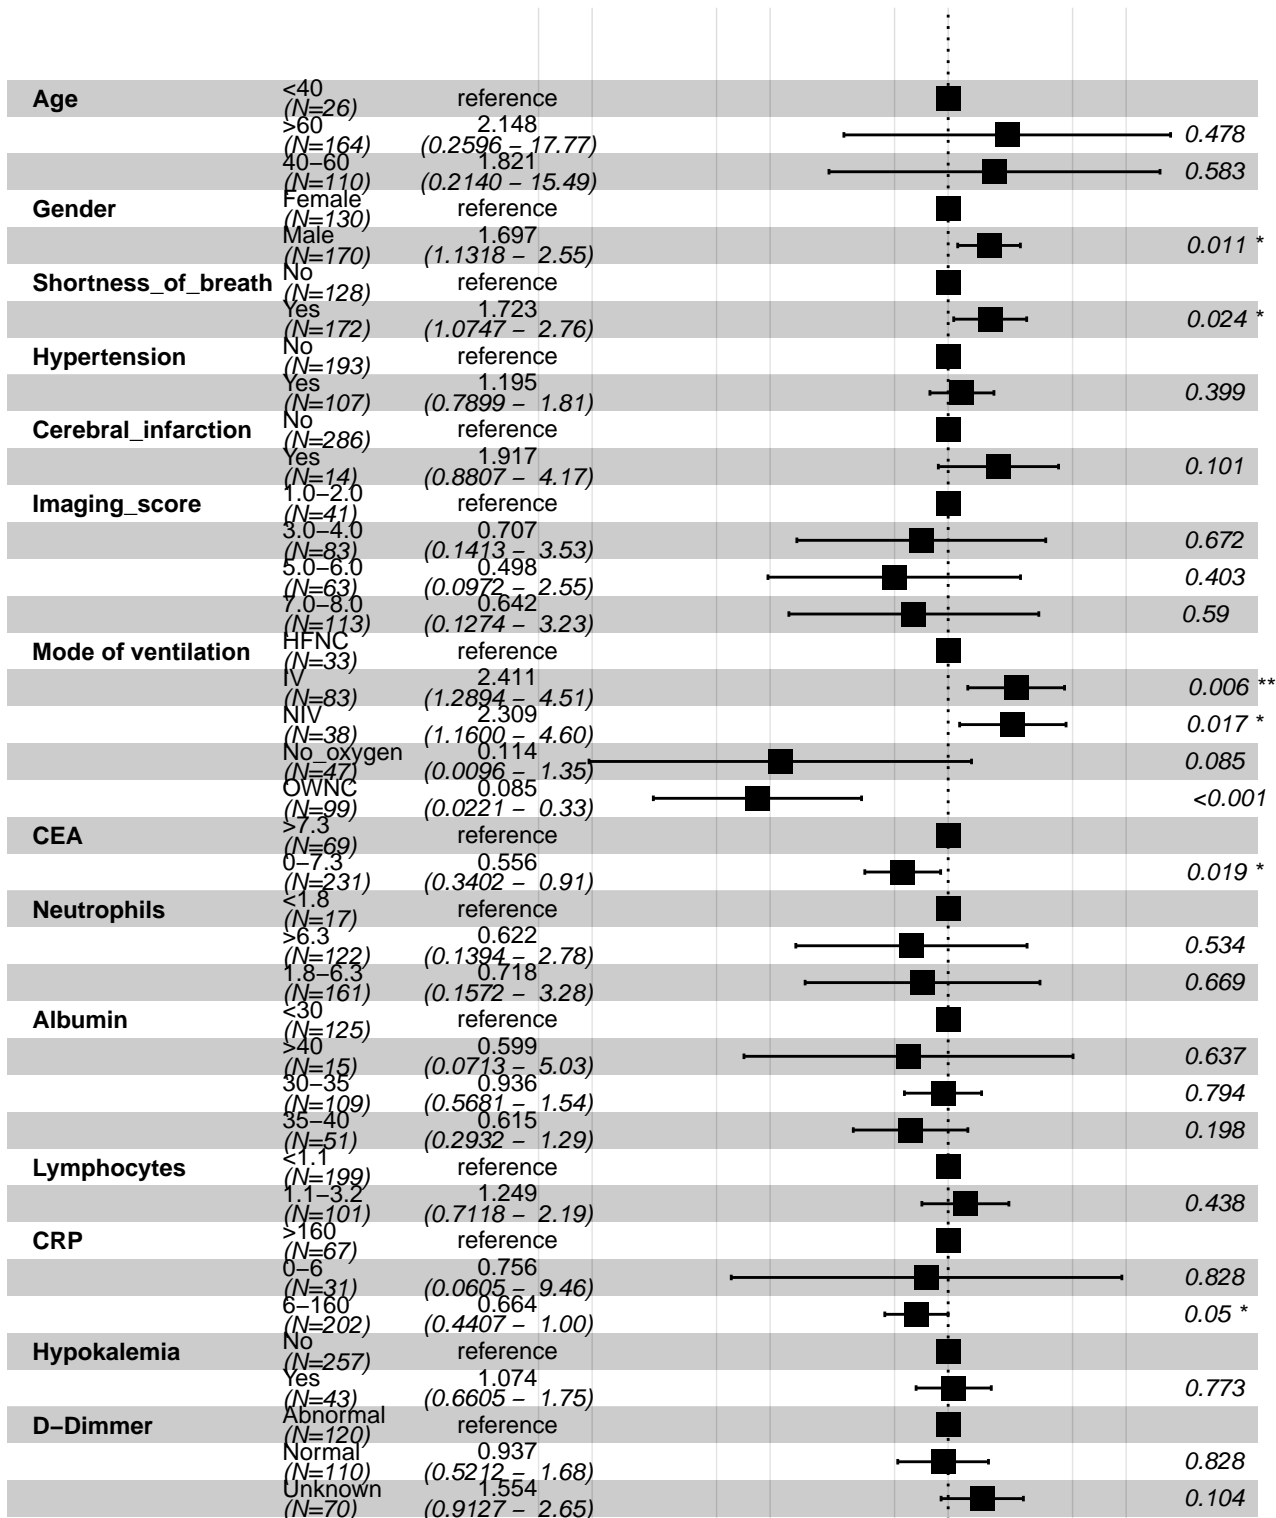

# Events: 126; Global p-value (Log-Rank): 1.5536e-25

AIC: 1098.62; Concordance Index: 0.82

0.005 0.01      0.05 0.1      0.5 1      5 10

# Hazard ratio

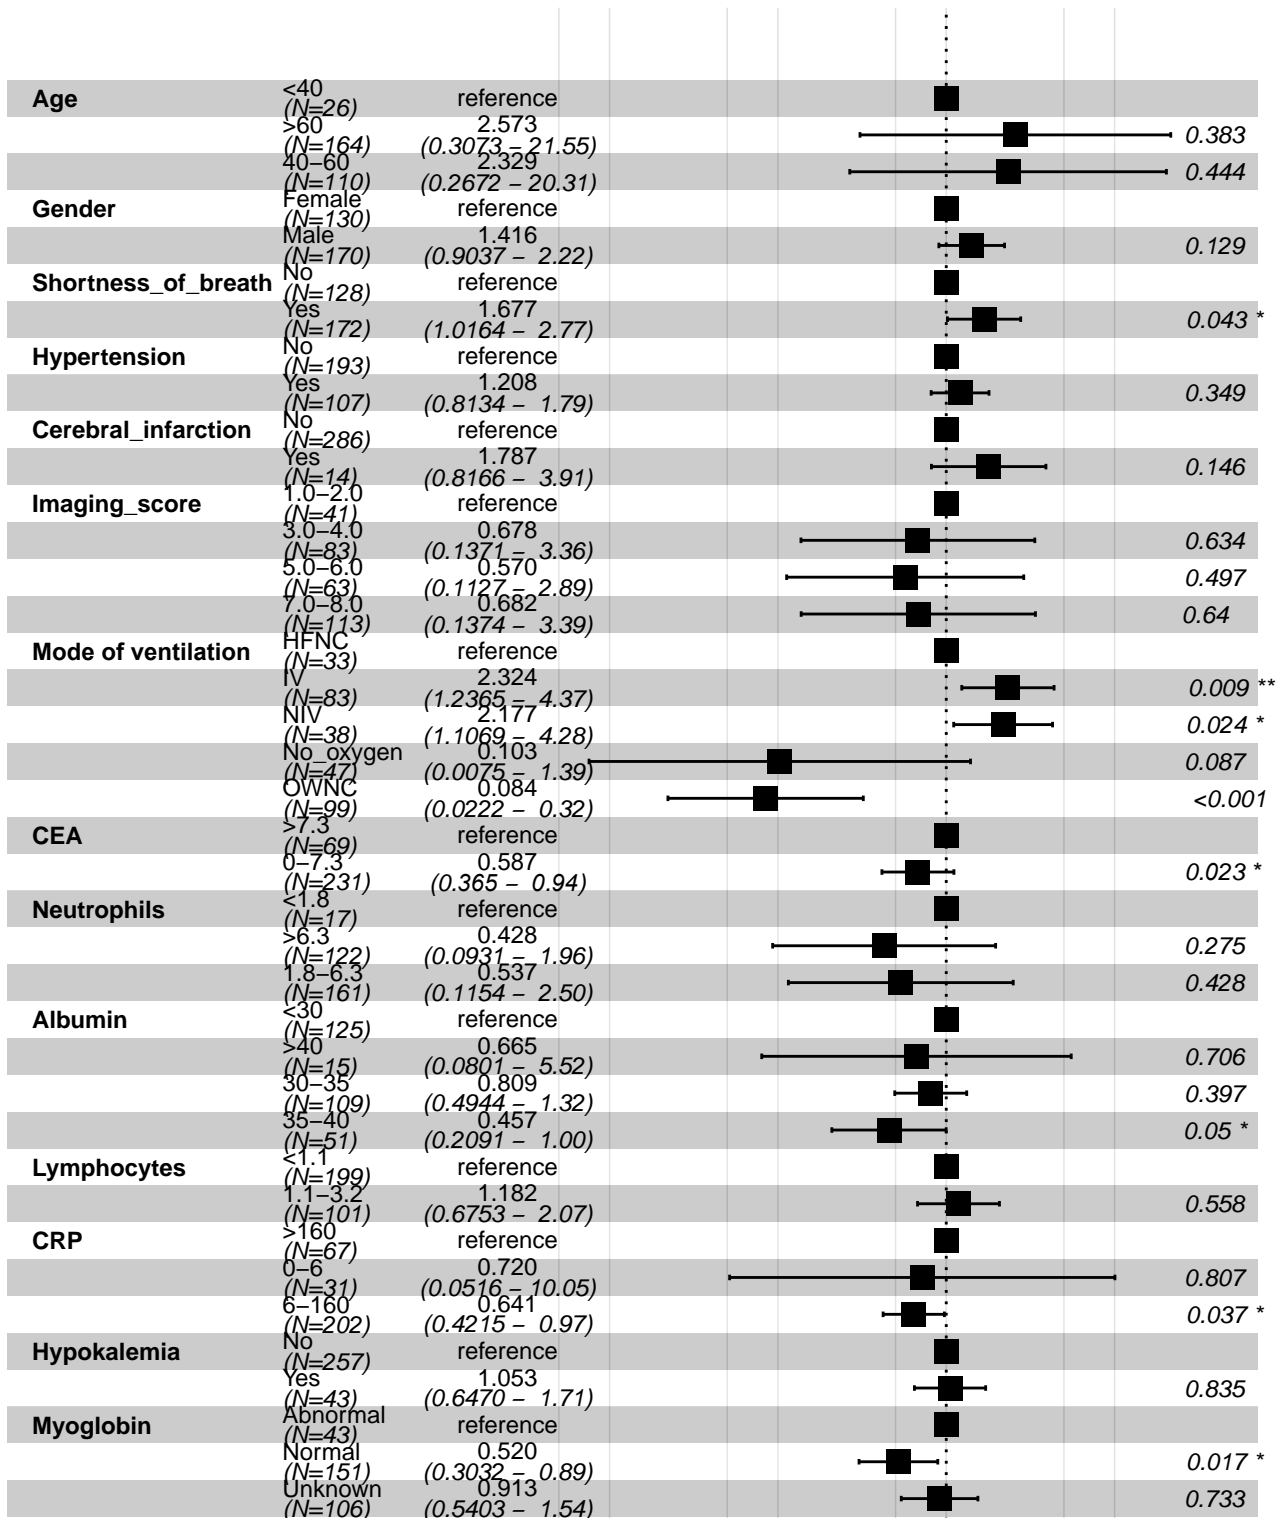

# Events: 126; Global p-value (Log-Rank): 1.6284e-26

AIC: 1093.47; Concordance Index: 0.84

0.005 0.01      0.05 0.1      0.5 1      5 10

# Hazard ratio

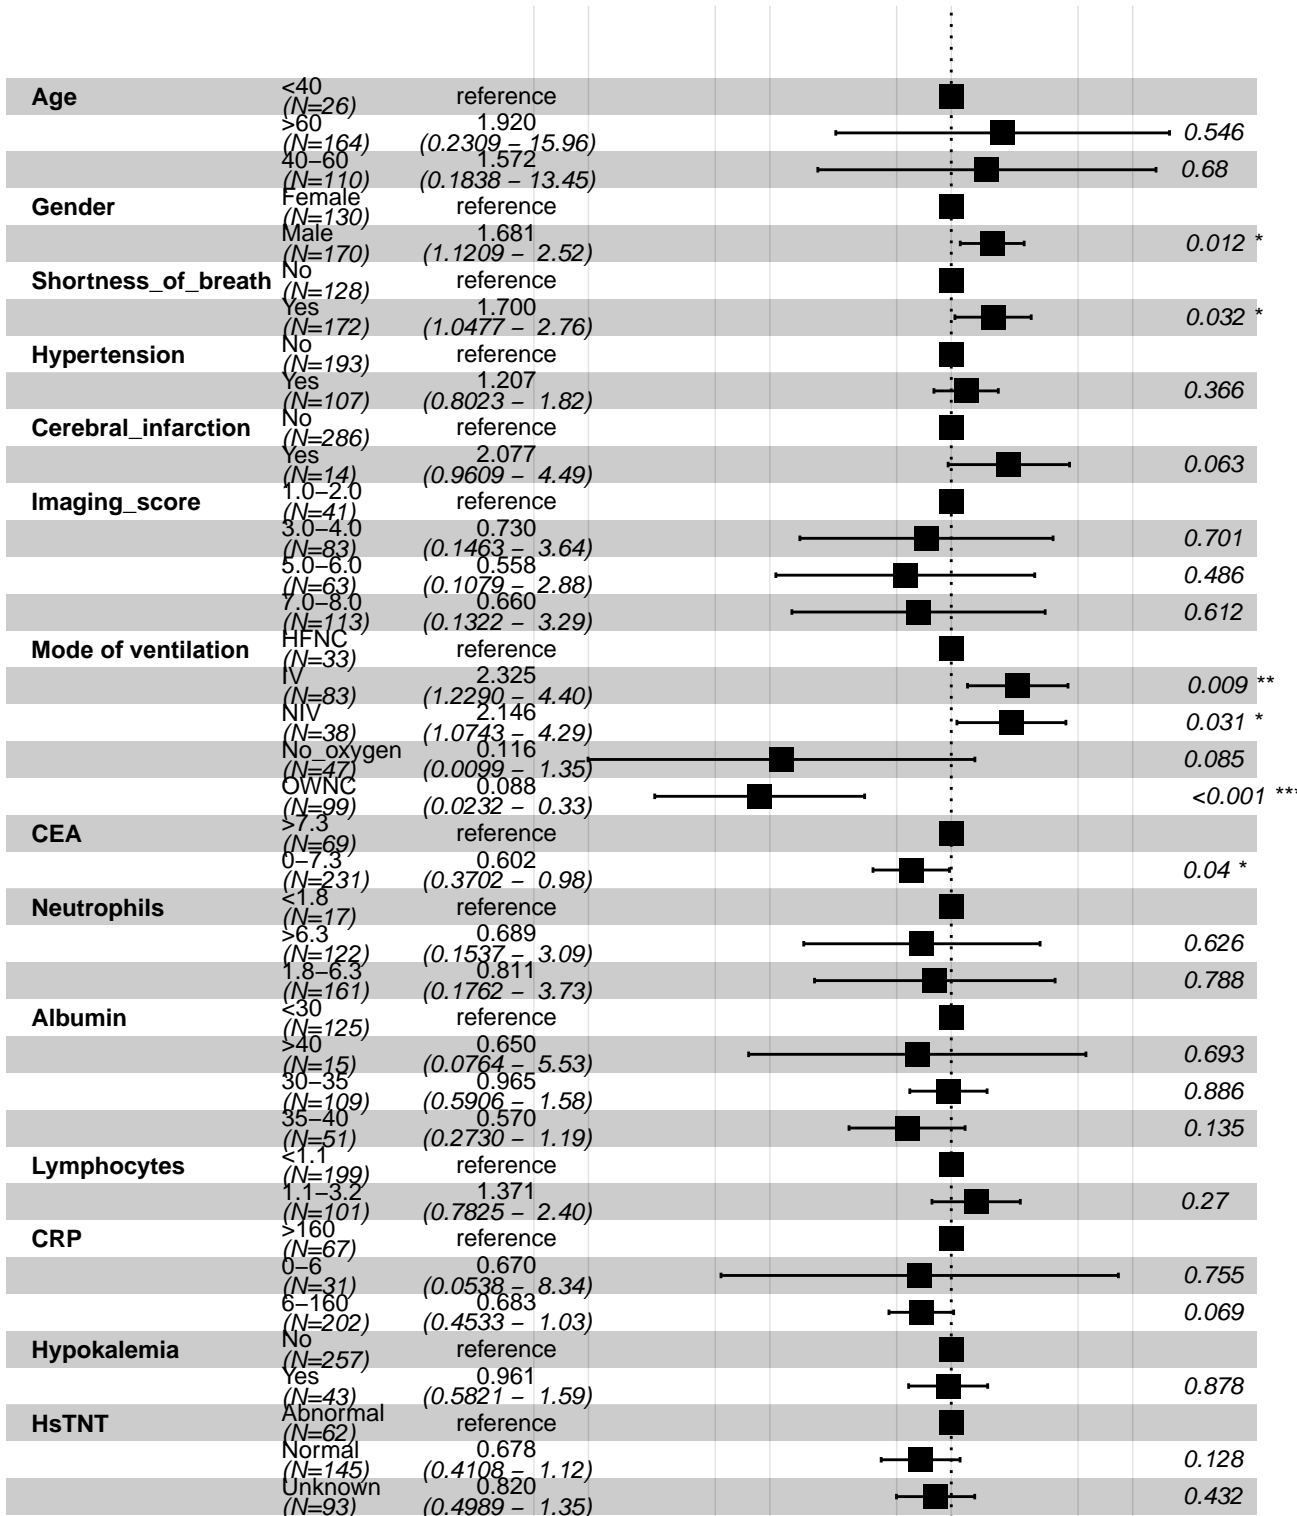

# Events: 126; Global p-value (Log-Rank): 1.901e-25

AIC: 1099.09; Concordance Index: 0.82

0.005 0.01      0.05 0.1      0.5 1      5 10
